# Supplementary material for: Field evaluation of seasonal trends in relative population sizes and dispersal pattern of Aedes albopictus males in support of the design of a sterile male release strategy
Source: Parasit Vectors. 2019 Feb 12;12:81. doi: 10.1186/s13071-019-3329-7 (PMC6371565; doi:10.1186/s13071-019-3329-7)
Supplement: Supplementary file 1 — Table S1. Total data set of released males Aedes albopictus recaptures according to the distance of the traps from the release point and the date of experiment. (XLS 53 kb) [file 13071_2019_3329_MOESM1_ESM.xls]

## Sheet: November
Total data set of released males Aedes albopictus recaptures according to the distance of the traps from the release point and the date of experiment. The three different dates are in different sheets indicated Movember, April and September. BG indicated BG sentinel traps, M indicated marked, and UM unmarked. J1, J2, J3 and J4 indicated the day of recapture.
distance in meter		J1		J2		J3		J4
0		M	UM	M	UM	M	UM	M	UM	total M
15	BG9	8	2	6	2	6	3	1	3	21
19	BG15	0	2	3	2	2	3	5	10	10
24	BG8	0	3	11	5	9	7	9	9	29
25
36	BG6	4	5	10	25	12	6	7	13	33
36	BG12	7	5	14	4	0	2	2	0	23
41	BG16	2	2	3	5	0	3	0	2	5
46	BG7	0	3	1	4	6	12	2	11	9
50
51	BG3	0	3	2	10	0	8	1	8	3
51	BG10	0	2	2	3	0	2	0	1	2
55	BG20	0	1	0	2	2	4	0	11	2
62	BG4	0	5	0	4	1	2	0	0	1
64	BG13	0	2	1	12	1	7	1	5	3
75
78	BG5	0	0	0	3	0	7	4	3	4
96	BG17-J1	1	0
97	BG11	0	0	0	13	0	12	0	0	0
98	BG1	0	1	0	8	0	9	0	4	0
100
107	BG19	0	0	0	0	0	0	0	1	0
114	BG2	0	1	0	2	0	2	1	5	1
116	BG14	0	2	0	1	1	0	0	0	1
125
139	BG17			0	23	0	1	0	5	0
140	BG18	0	3	0	8	0	3	0	8	0

## Sheet: April
		field													lab males
	distance	distance		J1		J2		J3		J4					distance		J1		J2		J3		J4
BG9	17	0		M	UM	M	UM	M	UM	M	UM	total M			0		M	NM	M	NM	M	NM	M	NM	total M
BG15	19	15	BG9	9	1	11	6	7	6	2	1	29			15	BG9	0	1	3	6	1	6	0	1	4
BG8	25	19	BG15	0	2	1	0	0	0	1	2	2			19	BG15	1	2	3	0	0	0	1	2	5
BG16	33	24	BG8	10	4	1	3	4	3	1	4	16			24	BG8	6	4	1	3	2	3	1	4	10
BG12	35	25													25
BG6	36.5	36	BG6	6	10	2	9	4	5	1	0	13			36	BG6	4	10	2	9	2	5	1	0	9
BG20	52	36	BG12	1	1	10	1	3	3	4	2	18			36	BG12	2	1	12	1	5	3	2	2	21
BG7	54	41	BG16	2	6	6	12	8	8	1	0	17			41	BG16	0	6	3	12	8	8	0	0	11
BG10	54.5	46	BG7	1	1	2	5	0	1	0	1	3			46	BG7	1	1	1	5	0	1	1	1	3
BG4	55	50													50
BG3	56	51	BG3	2	19	1	13	1	0	1	15	5			51	BG3	1	19	2	13	2	0	2	15	7
BG13	65	51	BG10	0	1	0	0	2	6	1	1	3			51	BG10	0	1	0	0	2	6	0	1	2
BG5	74	55	BG20	7	4	4	10	1	11	5	11	17			55	BG20	1	4	6	10	2	11	5	11	14
BG1	79	62	BG4	3	6	3	15	2	6	3	7	11			62	BG4	0	6	7	15	2	6	3	7	12
BG11	96	64	BG13	3	7	2	9	0	5	2	6	7			64	BG13	1	7	0	9	0	5	2	6	3
BG2	115	75													75
BG14	117.5	78	BG5	0	1	1	3	0	1	0	0	1			78	BG5	0	1	0	3	0	1		0	0
BG19	122																						0
BG18	138	97	BG11	0	0	0	3	0	3	0	0	0			97	BG11	0	0	0	3	0	3	0	0	0
BG17	139	98	BG1	0	9	0	4	3	7	0	3	3			98	BG1	0	9	0	4	0	7	0	3	0
		100													100
		107	BG19	0	2	0	3	0	5	0	0	0			107	BG19	0	2	0	3	0	5	0	0	0
		114	BG2	0	8	1	23	1	23	0	20	2			114	BG2	0	8	1	23	2	23	0	20	3
		116	BG14	0	0	0	1	1	3	0	1	1			116	BG14	1	0	0	1	0	3	0	1	1
		125													125
		139	BG17	0	3	1	16	0	6			1			139	BG17	0	3	0	16	0	6			0
		140	BG18	0	17	1	24	2	20			3			140	BG18	1	17	0	24	1	20			2

## Sheet: September
		field										lab males
		J1		J2		J3		J4						J1		J2		J3		J4
		M	UM	M	UM	M	UM	M	UM	total M				M	UM	M	UM	M	UM	M	UM	total M
BG9	17	1	0	7	0	8	0	2	2	18		BG9	17	3	0	8	0	5	0	0	2	16
BG15	19	15	1	15	2	7	1	2	0	39		BG15	19	23	1	8	2	2	1	3	0	36
BG6	25	28	1	32	3	17	2	5	3	82		BG6	25	24	1	30	3	25	2	5	3	84
BG8	25	3	4	4	2	5	1	1	1	13		BG8	25	4	4	4	2	6	1	1	1	15
BG12	43	0	0	0	1	0	0	0	0	0		BG12	43	0	0	0	1	2	0	2	0	4
BG16	33	0	0	2	0	3	1	0	0	5		BG16	33	3	0	3	0	0	1	0	0	6
BG7	54	0	3	1	10	0	7	1	10	2		BG7	54	0	3	0	10	0	7	1	10	1
BG3	56	0	0	2	1	0	0	1	1	3		BG3	56	2	0	0	1	0	0	1	1	3
BG4	52	0	2	1	0	1	7	0	4	2		BG4	52	0	2	0	0	0	7	0	4	0
BG5	74	0	2	0	5	0	5	0	4	0		BG5	74	0	2	0	5	0	5	0	4	0
BG10	54.5	0	0	0	0	1	1	0	0	1		BG10	54.5	0	0	1	0	1	1	0	0	2
BG13	65	0	4	1	4	0	2	1	3	2		BG13	65	0	4	0	4	1	2	0	3	1
BG20	52	0	0	0	0	0	2	0	1	0		BG20	52	0		3		1		1		5
BG1	79	0	0	1	0	0	0	0	0	1		BG1	79	1		0		1		1		3
BG11	96	0	0	0	0	0	0	0	0	0		BG11	96	0		0		0		0		0
										0												0
BG2	109	0	3	1	0	0	0	0	0	1		BG2	109	0		0		0		1		1
BG19	122	0	0	0	0	0	0	0	0	0		BG19	122	0		0		0		0		0
BG14	117.5	0	0	0	0	0	0	0	0	0		BG14	117.5	0		0		0		1		1
BG17	139	0	0	0	0	0	1	0	0	0		BG17	139	0		0		0		0		0
BG18	138	0	4	0	4	0	0	0	1	0		BG18	138	0		0		0		0		0
